# Supplementary material
Source: Springer Nature journal article supplement (https://www.springermedizin.de/resource/supplementary/12957_2013_1584_MOESM2_ESM.pdf/9563858)

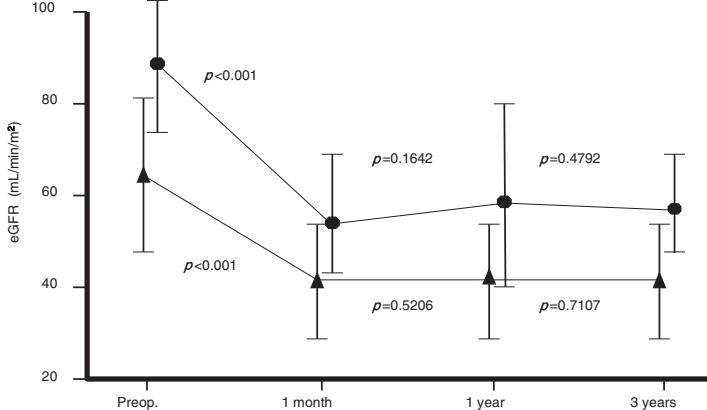

| eGFR/FRV        | Preop.                   | 1 month                  | 1 year                   | 3 years                  |
|-----------------|--------------------------|--------------------------|--------------------------|--------------------------|
| ● $\geq 0.24$   | 89.93 $\pm$ 16.16 (n=40) | 56.39 $\pm$ 13.79 (n=40) | 59.43 $\pm$ 20.10 (n=39) | 58.32 $\pm$ 10.73 (n=29) |
| ▲ $< 0.24$      | 64.14 $\pm$ 17.01 (n=43) | 42.01 $\pm$ 12.23 (n=43) | 42.25 $\pm$ 14.44 (n=38) | 41.18 $\pm$ 13.28 (n=27) |
| <i>p</i> -value | $p < 0.001$              | $p < 0.001$              | $p < 0.001$              | $p < 0.001$              |

Supplement: MOESM2 [file 9563858]
